# Supplementary material for: Extraction, identification and component analysis of exosome-like nanovesicles in Anoectochilus roxburghii (Wall.) Lindl.
Source: PeerJ journal article supplement (doi:10.7717/peerj.20182), 2025-10-13
Supplement: raw_data.zip [file Figure 2B.pdf › raw data/Figure 2B.pdf]

## Size &amp; Concentration Report

23 60×

Data File 20250430 23 60× 39.nfa

Population Total

SN: FNAN30E20071514

Software: V2.0

Sample Pressure: 1.0Kpa

Laser: 5/40 mW 488

SS Decay: 10%

Threshold/sub: 63.6 9.2 1.9 1/0 0 0 0

Min Width: 0.3 ms

## Total Size Information

Gating Range 30 - 150 nm

|               |         |
|---------------|---------|
| All Events    | 4837    |
| Gating Events | 4128    |
| % of all      | 85.34   |
| Median        | 80.2 nm |
| Mean          | 85.7 nm |
| Std Dev.      | 20.2 nm |

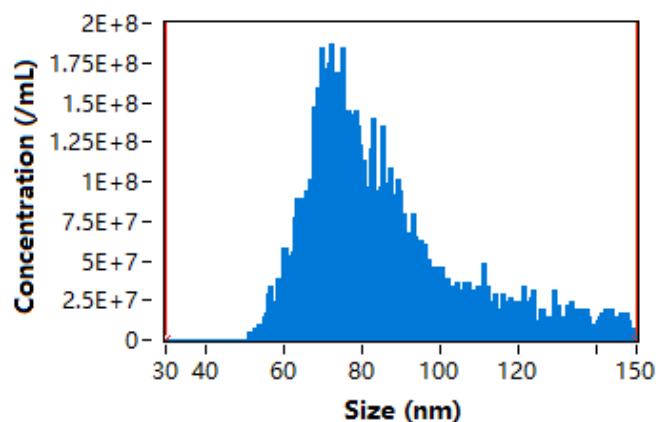

## Total Concentration Information

|                  | Particle Number | Dilution Factor |
|------------------|-----------------|-----------------|
| STD              | 5397            | 100             |
| Blank            | 60              | —               |
| Sample           | 4897            | 60              |
| STD Con.         | 2.16E+10        | Particles/mL    |
| Sample Flow Rate | 24.99           | nL/min          |
| Sample Con.      | 1.16E+10        | Particles/mL    |
| Corrected Ratio: | 4837/4837       | 100.0%          |

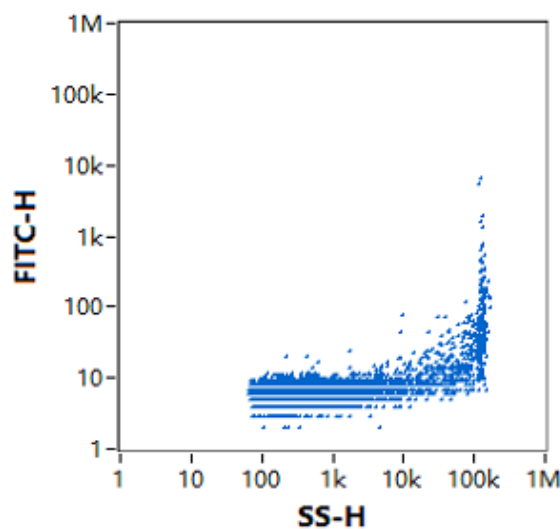

Report By :

2025/4/30 15:25
