# Supplementary material for: Extraction, identification and component analysis of exosome-like nanovesicles in Anoectochilus roxburghii (Wall.) Lindl.
Source: PeerJ journal article supplement (doi:10.7717/peerj.20182), 2025-10-13
Supplement: raw_data.zip [file Figure 2B.xlsx]

## Sheet: Sheet1
Size (nm) - events	Concentration (/mL) - events
30.25	0
30.75	0
31.25	0
31.75	0
32.25	0
32.75	0
33.25	0
33.75	0
34.25	0
34.75	0
35.25	0
35.75	0
36.25	0
36.75	0
37.25	0
37.75	0
38.25	0
38.75	0
39.25	0
39.75	0
40.25	0
40.75	0
41.25	0
41.75	0
42.25	0
42.75	0
43.25	0
43.75	0
44.25	0
44.75	0
45.25	0
45.75	0
46.25	0
46.75	0
47.25	0
47.75	0
48.25	0
48.75	0
49.25	0
49.75	0
50.25	0
50.75	0
51.25	4800000
51.75	2400000
52.25	0
52.75	7200000
53.25	0
53.75	9610000
54.25	9610000
54.75	4800000
55.25	14400000
55.75	16800000
56.25	28800000
56.75	33600000
57.25	14400000
57.75	24000000
58.25	12000000
58.75	38400000
59.25	33600000
59.75	38400000
60.25	57600000
60.75	57600000
61.25	28800000
61.75	48000000
62.25	52800000
62.75	55200000
63.25	76800000
63.75	88800000
64.25	21600000
64.75	88800000
65.25	74400000
65.75	93700000
66.25	72000000
66.75	101000000
67.25	88800000
67.75	146000000
68.25	113000000
68.75	158000000
69.25	137000000
69.75	185000000
70.25	149000000
70.75	170000000
71.25	122000000
71.75	175000000
72.25	187000000
72.75	154000000
73.25	168000000
73.75	132000000
74.25	168000000
74.75	146000000
75.25	185000000
75.75	142000000
76.25	144000000
76.75	144000000
77.25	86400000
77.75	142000000
78.25	84000000
78.75	144000000
79.25	134000000
79.75	122000000
80.25	103000000
80.75	113000000
81.25	96100000
81.75	79200000
82.25	120000000
82.75	139000000
83.25	93700000
83.75	81600000
84.25	84000000
84.75	96100000
85.25	134000000
85.75	98500000
86.25	79200000
86.75	93700000
87.25	108000000
87.75	91300000
88.25	67200000
88.75	76800000
89.25	101000000
89.75	93700000
90.25	72000000
90.75	79200000
91.25	40800000
91.75	67200000
92.25	64800000
92.75	64800000
93.25	79200000
93.75	64800000
94.25	52800000
94.75	52800000
95.25	62400000
95.75	40800000
96.25	60000000
96.75	40800000
97.25	50400000
97.75	45600000
98.25	40800000
98.75	45600000
99.25	14400000
99.75	28800000
100.25	45600000
100.75	33600000
101.25	24000000
101.75	38400000
102.25	31200000
102.75	28800000
103.25	33600000
103.75	33600000
104.25	36000000
104.75	14400000
105.25	31200000
105.75	31200000
106.25	36000000
106.75	33600000
107.25	36000000
107.75	28800000
108.25	31200000
108.75	31200000
109.25	21600000
109.75	33600000
110.25	28800000
110.75	26400000
111.25	48000000
111.75	12000000
112.25	33600000
112.75	16800000
113.25	14400000
113.75	24000000
114.25	28800000
114.75	14400000
115.25	19200000
115.75	28800000
116.25	14400000
116.75	24000000
117.25	21600000
117.75	26400000
118.25	14400000
118.75	21600000
119.25	24000000
119.75	24000000
120.25	21600000
120.75	24000000
121.25	33600000
121.75	12000000
122.25	24000000
122.75	14400000
123.25	26400000
123.75	31200000
124.25	12000000
124.75	7200000
125.25	4800000
125.75	19200000
126.25	19200000
126.75	4800000
127.25	12000000
127.75	14400000
128.25	12000000
128.75	14400000
129.25	31200000
129.75	12000000
130.25	21600000
130.75	12000000
131.25	9610000
131.75	14400000
132.25	14400000
132.75	21600000
133.25	24000000
133.75	4800000
134.25	12000000
134.75	19200000
135.25	12000000
135.75	12000000
136.25	19200000
136.75	12000000
137.25	19200000
137.75	14400000
138.25	4800000
138.75	0
139.25	9610000
139.75	2400000
140.25	12000000
140.75	14400000
141.25	16800000
141.75	14400000
142.25	19200000
142.75	7200000
143.25	9610000
143.75	19200000
144.25	14400000
144.75	9610000
145.25	14400000
145.75	2400000
146.25	16800000
146.75	14400000
147.25	4800000
147.75	16800000
148.25	12000000
148.75	4800000
149.25	7200000
149.75	4800000
