# Supplementary material for: Extraction, identification and component analysis of exosome-like nanovesicles in Anoectochilus roxburghii (Wall.) Lindl.
Source: PeerJ journal article supplement (doi:10.7717/peerj.20182), 2025-10-13
Supplement: raw_data.zip [file Figure 3.xlsx]

## Sheet: Sheet1
[Header]
Application Name	LabSolutions
Version	5.89
Data File Name	D:\DATA\2025\06\10 MIXUE\17_A. roxburghii 006_017.lcd
Output Date	2025-06-14
Output Time	17:54:43
[File Information]
Type	Data File
Generated	2025-06-10 21:28:53
Generated by	System Administrator
[Sample Information]
Operator Name	System Administrator
Acquired	2025-06-10 21:29:16
Sample Type	1:Standard
Level	6
Sample Name	A. roxburghii 006
Sample ID	A. roxburghii 006
Vial#	6
Injection Volume	5
Report Format File	C:\LabSolutions\System\DEFAULT.lsr
Tuning File	D:\TUNING\20250507.lct
[Configuration]
Instrument Name	LCMS-8040
[MS Chromatogram]
m/z	1-1MS(E-) TIC	Rutin
Interval(sec)
# of Points	1223
Start Time(min)	0
End Time(min)	11.996
R.Time(min)	Absolute Intensity	Relative Intensity
0	0	0
0.01	0	0
0.02	0	0
0.029	0	0
0.039	0	0
0.049	0	0
0.059	0	0
0.069	0	0
0.079	0	0
0.088	0	0
0.098	0	0
0.108	0	0
0.118	0	0
0.128	0	0
0.137	0	0
0.147	0	0
0.157	0	0
0.167	0	0
0.177	0	0
0.187	0	0
0.196	0	0
0.206	0	0
0.216	0	0
0.226	0	0
0.236	0	0
0.245	0	0
0.255	0	0
0.265	0	0
0.275	0	0
0.285	0	0
0.295	0	0
0.304	0	0
0.314	0	0
0.324	0	0
0.334	0	0
0.344	0	0
0.353	0	0
0.363	0	0
0.373	0	0
0.383	0	0
0.393	0	0
0.402	0	0
0.412	0	0
0.422	0	0
0.432	0	0
0.442	0	0
0.452	0	0
0.461	0	0
0.471	0	0
0.481	0	0
0.491	0	0
0.501	0	0
0.51	0	0
0.52	0	0
0.53	0	0
0.54	0	0
0.55	0	0
0.56	0	0
0.569	0	0
0.579	0	0
0.589	0	0
0.599	0	0
0.609	0	0
0.618	0	0
0.628	0	0
0.638	0	0
0.648	0	0
0.658	0	0
0.668	0	0
0.677	0	0
0.687	0	0
0.697	0	0
0.707	0	0
0.717	0	0
0.726	0	0
0.736	0	0
0.746	0	0
0.756	0	0
0.766	0	0
0.776	0	0
0.785	0	0
0.795	0	0
0.805	0	0
0.815	0	0
0.825	0	0
0.834	0	0
0.844	0	0
0.854	0	0
0.864	0	0
0.874	0	0
0.884	0	0
0.893	0	0
0.903	0	0
0.913	0	0
0.923	0	0
0.933	0	0
0.942	0	0
0.952	0	0
0.962	0	0
0.972	0	0
0.982	0	0
0.991	0	0
1.001	0	0
1.011	0	0
1.021	0	0
1.031	0	0
1.041	0	0
1.05	0	0
1.06	0	0
1.07	0	0
1.08	0	0
1.09	0	0
1.099	0	0
1.109	0	0
1.119	0	0
1.129	0	0
1.139	0	0
1.149	0	0
1.158	0	0
1.168	0	0
1.178	0	0
1.188	0	0
1.198	0	0
1.207	0	0
1.217	0	0
1.227	0	0
1.237	0	0
1.247	0	0
1.257	0	0
1.266	0	0
1.276	0	0
1.286	0	0
1.296	0	0
1.306	0	0
1.315	0	0
1.325	0	0
1.335	0	0
1.345	0	0
1.355	0	0
1.365	0	0
1.374	0	0
1.384	0	0
1.394	0	0
1.404	0	0
1.414	0	0
1.423	0	0
1.433	0	0
1.443	0	0
1.453	0	0
1.463	0	0
1.473	0	0
1.482	0	0
1.492	0	0
1.502	0	0
1.512	0	0
1.522	0	0
1.531	0	0
1.541	0	0
1.551	0	0
1.561	0	0
1.571	0	0
1.58	0	0
1.59	0	0
1.6	0	0
1.61	0	0
1.62	0	0
1.63	0	0
1.639	0	0
1.649	0	0
1.659	0	0
1.669	0	0
1.679	0	0
1.688	0	0
1.698	0	0
1.708	0	0
1.718	0	0
1.728	0	0
1.738	0	0
1.747	0	0
1.757	0	0
1.767	0	0
1.777	0	0
1.787	0	0
1.796	0	0
1.806	0	0
1.816	0	0
1.826	0	0
1.836	0	0
1.846	0	0
1.855	0	0
1.865	0	0
1.875	0	0
1.885	0	0
1.895	0	0
1.904	0	0
1.914	0	0
1.924	0	0
1.934	0	0
1.944	0	0
1.954	0	0
1.963	0	0
1.973	0	0
1.983	0	0
1.993	0	0
2.003	0	0
2.012	0	0
2.022	0	0
2.032	0	0
2.042	0	0
2.052	0	0
2.062	0	0
2.071	0	0
2.081	0	0
2.091	0	0
2.101	0	0
2.111	0	0
2.12	0	0
2.13	0	0
2.14	0	0
2.15	0	0
2.16	0	0
2.169	0	0
2.179	0	0
2.189	0	0
2.199	0	0
2.209	0	0
2.219	0	0
2.228	0	0
2.238	0	0
2.248	0	0
2.258	0	0
2.268	0	0
2.277	0	0
2.287	0	0
2.297	0	0
2.307	0	0
2.317	0	0
2.327	0	0
2.336	0	0
2.346	0	0
2.356	0	0
2.366	0	0
2.376	0	0
2.385	0	0
2.395	0	0
2.405	0	0
2.415	0	0
2.425	0	0
2.435	0	0
2.444	0	0
2.454	0	0
2.464	0	0
2.474	0	0
2.484	0	0
2.493	0	0
2.503	0	0
2.513	0	0
2.523	0	0
2.533	0	0
2.543	0	0
2.552	0	0
2.562	0	0
2.572	0	0
2.582	0	0
2.592	0	0
2.601	0	0
2.611	0	0
2.621	0	0
2.631	0	0
2.641	0	0
2.651	0	0
2.66	0	0
2.67	0	0
2.68	0	0
2.69	0	0
2.7	0	0
2.709	0	0
2.719	0	0
2.729	0	0
2.739	0	0
2.749	0	0
2.758	0	0
2.768	0	0
2.778	0	0
2.788	0	0
2.798	0	0
2.808	0	0
2.817	0	0
2.827	0	0
2.837	0	0
2.847	0	0
2.857	0	0
2.866	0	0
2.876	0	0
2.886	0	0
2.896	0	0
2.906	0	0
2.916	0	0
2.925	0	0
2.935	0	0
2.945	0	0
2.955	0	0
2.965	0	0
2.974	0	0
2.984	0	0
2.994	0	0
3.004	0	0
3.014	0	0
3.024	0	0
3.033	0	0
3.043	0	0
3.053	0	0
3.063	0	0
3.073	0	0
3.082	0	0
3.092	0	0
3.102	0	0
3.112	0	0
3.122	0	0
3.132	0	0
3.141	0	0
3.151	0	0
3.161	0	0
3.171	0	0
3.181	0	0
3.19	0	0
3.2	0	0
3.21	0	0
3.22	0	0
3.23	0	0
3.24	0	0
3.249	0	0
3.259	0	0
3.269	0	0
3.279	0	0
3.289	0	0
3.298	0	0
3.308	0	0
3.318	0	0
3.328	0	0
3.338	0	0
3.347	0	0
3.357	0	0
3.367	0	0
3.377	0	0
3.387	0	0
3.397	0	0
3.406	0	0
3.416	0	0
3.426	0	0
3.436	0	0
3.446	0	0
3.455	0	0
3.465	0	0
3.475	0	0
3.485	0	0
3.495	0	0
3.505	0	0
3.514	0	0
3.524	0	0
3.534	0	0
3.544	0	0
3.554	0	0
3.563	0	0
3.573	0	0
3.583	0	0
3.593	0	0
3.603	0	0
3.613	0	0
3.622	0	0
3.632	0	0
3.642	0	0
3.652	0	0
3.662	0	0
3.671	0	0
3.681	0	0
3.691	0	0
3.701	0	0
3.711	0	0
3.721	0	0
3.73	0	0
3.74	0	0
3.75	0	0
3.76	0	0
3.77	0	0
3.779	0	0
3.789	0	0
3.799	0	0
3.809	0	0
3.819	0	0
3.829	0	0
3.838	0	0
3.848	0	0
3.858	0	0
3.868	0	0
3.878	0	0
3.887	0	0
3.897	0	0
3.907	0	0
3.917	0	0
3.927	0	0
3.936	0	0
3.946	0	0
3.956	0	0
3.966	0	0
3.976	0	0
3.986	0	0
3.995	0	0
4.005	0	0
4.015	0	0
4.025	0	0
4.035	0	0
4.044	0	0
4.054	0	0
4.064	0	0
4.074	0	0
4.084	0	0
4.094	0	0
4.103	0	0
4.113	0	0
4.123	0	0
4.133	0	0
4.143	0	0
4.152	0	0
4.162	0	0
4.172	0	0
4.182	0	0
4.192	0	0
4.202	0	0
4.211	0	0
4.221	0	0
4.231	0	0
4.241	0	0
4.251	0	0
4.26	0	0
4.27	0	0
4.28	0	0
4.29	0	0
4.3	0	0
4.31	0	0
4.319	0	0
4.329	0	0
4.339	0	0
4.349	0	0
4.359	0	0
4.368	0	0
4.378	0	0
4.388	0	0
4.398	0	0
4.408	0	0
4.418	0	0
4.427	0	0
4.437	0	0
4.447	0	0
4.457	0	0
4.467	0	0
4.476	0	0
4.486	0	0
4.496	0	0
4.506	0	0
4.516	0	0
4.525	0	0
4.535	0	0
4.545	0	0
4.555	0	0
4.565	0	0
4.575	0	0
4.584	0	0
4.594	0	0
4.604	0	0
4.614	0	0
4.624	0	0
4.633	0	0
4.643	0	0
4.653	0	0
4.663	0	0
4.673	0	0
4.683	0	0
4.692	0	0
4.702	0	0
4.712	0	0
4.722	0	0
4.732	0	0
4.741	0	0
4.751	0	0
4.761	0	0
4.771	0	0
4.781	0	0
4.791	0	0
4.8	0	0
4.81	0	0
4.82	0	0
4.83	0	0
4.84	0	0
4.849	0	0
4.859	0	0
4.869	0	0
4.879	0	0
4.889	0	0
4.899	0	0
4.908	0	0
4.918	0	0
4.928	0	0
4.938	0	0
4.948	0	0
4.957	0	0
4.967	0	0
4.977	0	0
4.987	0	0
4.997	0	0
5.007	0	0
5.016	0	0
5.026	0	0
5.036	0	0
5.046	0	0
5.056	0	0
5.065	0	0
5.075	0	0
5.085	0	0
5.095	0	0
5.105	0	0
5.114	0	0
5.124	0	0
5.134	0	0
5.144	0	0
5.154	0	0
5.164	0	0
5.173	0	0
5.183	0	0
5.193	0	0
5.203	0	0
5.213	0	0
5.222	0	0
5.232	0	0
5.242	0	0
5.252	0	0
5.262	0	0
5.272	0	0
5.281	0	0
5.291	0	0
5.301	0	0
5.311	0	0
5.321	0	0
5.33	0	0
5.34	0	0
5.35	0	0
5.36	0	0
5.37	0	0
5.38	0	0
5.389	0	0
5.399	26	0.15
5.409	103	0.6
5.419	328	1.9
5.429	892	5.16
5.438	2074	12
5.448	3990	23.09
5.458	6842	39.59
5.468	10199	59.02
5.478	13627	78.86
5.488	16041	92.82
5.497	17235	99.73
5.507	17281	100
5.517	16426	95.05
5.527	14873	86.07
5.537	12638	73.13
5.546	10239	59.25
5.556	8042	46.54
5.566	6181	35.77
5.576	4805	27.81
5.586	3562	20.61
5.596	2603	15.06
5.605	1731	10.02
5.615	1163	6.73
5.625	810	4.69
5.635	625	3.62
5.645	522	3.02
5.654	437	2.53
5.664	356	2.06
5.674	285	1.65
5.684	225	1.3
5.694	186	1.08
5.703	143	0.83
5.713	112	0.65
5.723	92	0.53
5.733	83	0.48
5.743	86	0.5
5.753	83	0.48
5.762	83	0.48
5.772	69	0.4
5.782	60	0.35
5.792	49	0.28
5.802	43	0.25
5.811	38	0.22
5.821	38	0.22
5.831	40	0.23
5.841	38	0.22
5.851	26	0.15
5.861	14	0.08
5.87	12	0.07
5.88	17	0.1
5.89	20	0.12
5.9	17	0.1
5.91	9	0.05
5.919	3	0.02
5.929	0	0
5.939	0	0
5.949	0	0
5.959	0	0
5.969	0	0
5.978	0	0
5.988	0	0
5.998	9	0.05
6.008	29	0.17
6.018	61	0.35
6.027	81	0.47
6.037	78	0.45
6.047	52	0.3
6.057	23	0.13
6.067	6	0.03
6.077	0	0
6.086	0	0
6.096	0	0
6.106	0	0
6.116	0	0
6.126	0	0
6.135	0	0
6.145	0	0
6.155	0	0
6.165	0	0
6.175	0	0
6.184	0	0
6.194	0	0
6.204	0	0
6.214	0	0
6.224	0	0
6.234	0	0
6.243	0	0
6.253	0	0
6.263	0	0
6.273	0	0
6.283	0	0
6.292	0	0
6.302	3	0.02
6.312	6	0.03
6.322	9	0.05
6.332	6	0.03
6.342	3	0.02
6.351	0	0
6.361	0	0
6.371	0	0
6.381	0	0
6.391	0	0
6.4	0	0
6.41	0	0
6.42	0	0
6.43	3	0.02
6.44	6	0.03
6.45	9	0.05
6.459	6	0.03
6.469	3	0.02
6.479	0	0
6.489	0	0
6.499	0	0
6.508	3	0.02
6.518	6	0.03
6.528	9	0.05
6.538	6	0.03
6.548	3	0.02
6.558	0	0
6.567	0	0
6.577	0	0
6.587	3	0.02
6.597	12	0.07
6.607	20	0.12
6.616	23	0.13
6.626	15	0.09
6.636	6	0.03
6.646	0	0
6.656	0	0
6.666	0	0
6.675	0	0
6.685	0	0
6.695	0	0
6.705	0	0
6.715	0	0
6.724	0	0
6.734	0	0
6.744	0	0
6.754	3	0.02
6.764	9	0.05
6.774	17	0.1
6.783	20	0.12
6.793	20	0.12
6.803	14	0.08
6.813	12	0.07
6.823	6	0.03
6.832	3	0.02
6.842	0	0
6.852	0	0
6.862	0	0
6.872	0	0
6.881	0	0
6.891	0	0
6.901	0	0
6.911	0	0
6.921	0	0
6.931	0	0
6.94	0	0
6.95	0	0
6.96	0	0
6.97	0	0
6.98	0	0
6.989	0	0
6.999	0	0
7.009	0	0
7.019	0	0
7.029	0	0
7.039	0	0
7.048	0	0
7.058	0	0
7.068	0	0
7.078	0	0
7.088	0	0
7.097	0	0
7.107	0	0
7.117	0	0
7.127	0	0
7.137	0	0
7.147	0	0
7.156	0	0
7.166	0	0
7.176	0	0
7.186	0	0
7.196	0	0
7.205	0	0
7.215	0	0
7.225	0	0
7.235	0	0
7.245	0	0
7.255	0	0
7.264	0	0
7.274	0	0
7.284	0	0
7.294	0	0
7.304	0	0
7.313	0	0
7.323	0	0
7.333	0	0
7.343	0	0
7.353	0	0
7.363	0	0
7.372	0	0
7.382	0	0
7.392	0	0
7.402	0	0
7.412	0	0
7.421	0	0
7.431	0	0
7.441	0	0
7.451	0	0
7.461	0	0
7.47	0	0
7.48	0	0
7.49	0	0
7.5	0	0
7.51	0	0
7.52	0	0
7.529	0	0
7.539	0	0
7.549	0	0
7.559	0	0
7.569	0	0
7.578	0	0
7.588	0	0
7.598	0	0
7.608	0	0
7.618	0	0
7.628	0	0
7.637	0	0
7.647	0	0
7.657	0	0
7.667	0	0
7.677	0	0
7.686	0	0
7.696	0	0
7.706	0	0
7.716	0	0
7.726	0	0
7.736	0	0
7.745	0	0
7.755	0	0
7.765	0	0
7.775	0	0
7.785	0	0
7.794	0	0
7.804	0	0
7.814	0	0
7.824	0	0
7.834	0	0
7.844	0	0
7.853	0	0
7.863	0	0
7.873	0	0
7.883	0	0
7.893	0	0
7.902	0	0
7.912	0	0
7.922	0	0
7.932	0	0
7.942	0	0
7.952	0	0
7.961	0	0
7.971	0	0
7.981	0	0
7.991	0	0
8.001	0	0
8.01	0	0
8.02	0	0
8.03	0	0
8.04	0	0
8.05	0	0
8.059	0	0
8.069	0	0
8.079	0	0
8.089	0	0
8.099	0	0
8.109	0	0
8.118	0	0
8.128	0	0
8.138	0	0
8.148	0	0
8.158	0	0
8.167	0	0
8.177	0	0
8.187	0	0
8.197	0	0
8.207	0	0
8.217	0	0
8.226	0	0
8.236	0	0
8.246	0	0
8.256	0	0
8.266	0	0
8.275	0	0
8.285	0	0
8.295	0	0
8.305	0	0
8.315	0	0
8.325	0	0
8.334	0	0
8.344	0	0
8.354	0	0
8.364	0	0
8.374	0	0
8.383	0	0
8.393	0	0
8.403	0	0
8.413	0	0
8.423	0	0
8.433	0	0
8.442	0	0
8.452	0	0
8.462	0	0
8.472	0	0
8.482	0	0
8.491	0	0
8.501	0	0
8.511	0	0
8.521	0	0
8.531	0	0
8.54	0	0
8.55	0	0
8.56	0	0
8.57	0	0
8.58	0	0
8.59	0	0
8.599	0	0
8.609	0	0
8.619	0	0
8.629	0	0
8.639	0	0
8.648	0	0
8.658	0	0
8.668	0	0
8.678	0	0
8.688	0	0
8.698	0	0
8.707	0	0
8.717	0	0
8.727	0	0
8.737	0	0
8.747	0	0
8.756	0	0
8.766	0	0
8.776	0	0
8.786	0	0
8.796	0	0
8.806	0	0
8.815	0	0
8.825	0	0
8.835	0	0
8.845	0	0
8.855	0	0
8.864	0	0
8.874	0	0
8.884	0	0
8.894	0	0
8.904	0	0
8.914	0	0
8.923	0	0
8.933	0	0
8.943	0	0
8.953	0	0
8.963	0	0
8.972	0	0
8.982	0	0
8.992	0	0
9.002	0	0
9.012	0	0
9.022	0	0
9.031	0	0
9.041	0	0
9.051	0	0
9.061	0	0
9.071	0	0
9.08	0	0
9.09	0	0
9.1	0	0
9.11	0	0
9.12	0	0
9.13	0	0
9.139	0	0
9.149	0	0
9.159	0	0
9.169	0	0
9.179	0	0
9.188	0	0
9.198	0	0
9.208	0	0
9.218	0	0
9.228	0	0
9.237	0	0
9.247	0	0
9.257	0	0
9.267	0	0
9.277	0	0
9.287	0	0
9.296	0	0
9.306	0	0
9.316	0	0
9.326	0	0
9.336	0	0
9.345	0	0
9.355	0	0
9.365	0	0
9.375	0	0
9.385	0	0
9.395	0	0
9.404	0	0
9.414	0	0
9.424	0	0
9.434	0	0
9.444	0	0
9.453	0	0
9.463	0	0
9.473	0	0
9.483	0	0
9.493	0	0
9.503	0	0
9.512	0	0
9.522	0	0
9.532	0	0
9.542	0	0
9.552	0	0
9.561	0	0
9.571	0	0
9.581	0	0
9.591	0	0
9.601	0	0
9.611	0	0
9.62	0	0
9.63	0	0
9.64	0	0
9.65	0	0
9.66	0	0
9.669	0	0
9.679	0	0
9.689	0	0
9.699	0	0
9.709	0	0
9.719	0	0
9.728	0	0
9.738	0	0
9.748	0	0
9.758	0	0
9.768	0	0
9.777	0	0
9.787	0	0
9.797	0	0
9.807	0	0
9.817	0	0
9.826	0	0
9.836	0	0
9.846	0	0
9.856	0	0
9.866	0	0
9.876	0	0
9.885	0	0
9.895	0	0
9.905	0	0
9.915	0	0
9.925	0	0
9.934	0	0
9.944	0	0
9.954	0	0
9.964	0	0
9.974	0	0
9.984	0	0
9.993	0	0
10.003	0	0
10.013	0	0
10.023	0	0
10.033	0	0
10.042	0	0
10.052	0	0
10.062	0	0
10.072	0	0
10.082	0	0
10.092	0	0
10.101	0	0
10.111	0	0
10.121	0	0
10.131	0	0
10.141	0	0
10.15	0	0
10.16	0	0
10.17	0	0
10.18	0	0
10.19	0	0
10.2	0	0
10.209	0	0
10.219	0	0
10.229	0	0
10.239	0	0
10.249	0	0
10.258	0	0
10.268	0	0
10.278	0	0
10.288	0	0
10.298	0	0
10.308	0	0
10.317	0	0
10.327	0	0
10.337	0	0
10.347	0	0
10.357	0	0
10.366	0	0
10.376	0	0
10.386	0	0
10.396	0	0
10.406	0	0
10.415	0	0
10.425	0	0
10.435	0	0
10.445	0	0
10.455	0	0
10.465	0	0
10.474	0	0
10.484	0	0
10.494	0	0
10.504	0	0
10.514	0	0
10.523	0	0
10.533	0	0
10.543	0	0
10.553	0	0
10.563	0	0
10.573	0	0
10.582	0	0
10.592	0	0
10.602	0	0
10.612	0	0
10.622	0	0
10.631	0	0
10.641	0	0
10.651	0	0
10.661	0	0
10.671	0	0
10.681	0	0
10.69	0	0
10.7	0	0
10.71	0	0
10.72	0	0
10.73	0	0
10.739	0	0
10.749	0	0
10.759	0	0
10.769	0	0
10.779	0	0
10.789	0	0
10.798	0	0
10.808	0	0
10.818	0	0
10.828	0	0
10.838	0	0
10.847	0	0
10.857	0	0
10.867	0	0
10.877	0	0
10.887	0	0
10.897	0	0
10.906	0	0
10.916	0	0
10.926	0	0
10.936	0	0
10.946	0	0
10.955	0	0
10.965	0	0
10.975	0	0
10.985	0	0
10.995	0	0
11.004	0	0
11.014	0	0
11.024	0	0
11.034	0	0
11.044	0	0
11.054	0	0
11.063	0	0
11.073	0	0
11.083	0	0
11.093	0	0
11.103	0	0
11.112	0	0
11.122	0	0
11.132	0	0
11.142	0	0
11.152	0	0
11.162	0	0
11.171	0	0
11.181	0	0
11.191	0	0
11.201	0	0
11.211	0	0
11.22	0	0
11.23	0	0
11.24	0	0
11.25	0	0
11.26	0	0
11.27	0	0
11.279	0	0
11.289	0	0
11.299	0	0
11.309	0	0
11.319	0	0
11.328	0	0
11.338	0	0
11.348	0	0
11.358	0	0
11.368	0	0
11.378	0	0
11.387	0	0
11.397	0	0
11.407	0	0
11.417	0	0
11.427	0	0
11.436	0	0
11.446	0	0
11.456	0	0
11.466	0	0
11.476	0	0
11.486	0	0
11.495	0	0
11.505	0	0
11.515	0	0
11.525	0	0
11.535	0	0
11.544	0	0
11.554	0	0
11.564	0	0
11.574	0	0
11.584	0	0
11.593	0	0
11.603	0	0
11.613	0	0
11.623	0	0
11.633	0	0
11.643	0	0
11.652	0	0
11.662	0	0
11.672	0	0
11.682	0	0
11.692	0	0
11.701	0	0
11.711	0	0
11.721	0	0
11.731	0	0
11.741	0	0
11.751	0	0
11.76	0	0
11.77	0	0
11.78	0	0
11.79	0	0
11.8	0	0
11.809	0	0
11.819	0	0
11.829	0	0
11.839	0	0
11.849	0	0
11.859	0	0
11.868	0	0
11.878	0	0
11.888	0	0
11.898	0	0
11.908	0	0
11.917	0	0
11.927	0	0
11.937	0	0
11.947	0	0
11.957	0	0
11.967	0	0
11.976	0	0
11.986	0	0
11.996	0	0
[MS Chromatogram]
m/z	1-2MS(E-) TIC	Narcissoside
Interval(sec)
# of Points	1223
Start Time(min)	0.001
End Time(min)	11.997
R.Time(min)	Absolute Intensity	Relative Intensity
0.001	0	0
0.011	0	0
0.021	0	0
0.031	0	0
0.041	0	0
0.05	0	0
0.06	0	0
0.07	0	0
0.08	0	0
0.09	0	0
0.1	0	0
0.109	0	0
0.119	0	0
0.129	0	0
0.139	0	0
0.149	0	0
0.158	0	0
0.168	0	0
0.178	0	0
0.188	0	0
0.198	0	0
0.208	0	0
0.217	0	0
0.227	0	0
0.237	0	0
0.247	0	0
0.257	0	0
0.266	0	0
0.276	0	0
0.286	0	0
0.296	0	0
0.306	0	0
0.316	0	0
0.325	0	0
0.335	0	0
0.345	0	0
0.355	0	0
0.365	0	0
0.374	0	0
0.384	0	0
0.394	0	0
0.404	0	0
0.414	0	0
0.424	0	0
0.433	0	0
0.443	0	0
0.453	0	0
0.463	0	0
0.473	0	0
0.482	0	0
0.492	0	0
0.502	0	0
0.512	0	0
0.522	0	0
0.531	0	0
0.541	0	0
0.551	0	0
0.561	0	0
0.571	0	0
0.581	0	0
0.59	0	0
0.6	0	0
0.61	0	0
0.62	0	0
0.63	0	0
0.639	0	0
0.649	0	0
0.659	0	0
0.669	0	0
0.679	0	0
0.689	0	0
0.698	0	0
0.708	0	0
0.718	0	0
0.728	0	0
0.738	0	0
0.747	0	0
0.757	0	0
0.767	0	0
0.777	0	0
0.787	0	0
0.797	0	0
0.806	0	0
0.816	0	0
0.826	0	0
0.836	0	0
0.846	0	0
0.855	0	0
0.865	0	0
0.875	0	0
0.885	0	0
0.895	0	0
0.905	0	0
0.914	0	0
0.924	0	0
0.934	0	0
0.944	0	0
0.954	0	0
0.963	0	0
0.973	0	0
0.983	0	0
0.993	0	0
1.003	0	0
1.013	0	0
1.022	0	0
1.032	0	0
1.042	0	0
1.052	0	0
1.062	0	0
1.071	0	0
1.081	0	0
1.091	0	0
1.101	0	0
1.111	0	0
1.121	0	0
1.13	0	0
1.14	0	0
1.15	0	0
1.16	0	0
1.17	0	0
1.179	0	0
1.189	0	0
1.199	0	0
1.209	0	0
1.219	0	0
1.228	0	0
1.238	0	0
1.248	0	0
1.258	0	0
1.268	0	0
1.278	0	0
1.287	0	0
1.297	0	0
1.307	0	0
1.317	0	0
1.327	0	0
1.336	0	0
1.346	0	0
1.356	0	0
1.366	0	0
1.376	0	0
1.386	0	0
1.395	0	0
1.405	0	0
1.415	0	0
1.425	0	0
1.435	0	0
1.444	0	0
1.454	0	0
1.464	0	0
1.474	0	0
1.484	0	0
1.494	0	0
1.503	0	0
1.513	0	0
1.523	0	0
1.533	0	0
1.543	0	0
1.552	0	0
1.562	0	0
1.572	0	0
1.582	0	0
1.592	0	0
1.602	0	0
1.611	0	0
1.621	0	0
1.631	0	0
1.641	0	0
1.651	0	0
1.66	0	0
1.67	0	0
1.68	0	0
1.69	0	0
1.7	0	0
1.71	0	0
1.719	0	0
1.729	0	0
1.739	0	0
1.749	0	0
1.759	0	0
1.768	0	0
1.778	0	0
1.788	0	0
1.798	0	0
1.808	0	0
1.817	0	0
1.827	0	0
1.837	0	0
1.847	0	0
1.857	0	0
1.867	0	0
1.876	0	0
1.886	0	0
1.896	0	0
1.906	0	0
1.916	0	0
1.925	0	0
1.935	0	0
1.945	0	0
1.955	0	0
1.965	0	0
1.975	0	0
1.984	0	0
1.994	0	0
2.004	0	0
2.014	0	0
2.024	0	0
2.033	0	0
2.043	0	0
2.053	0	0
2.063	0	0
2.073	0	0
2.083	0	0
2.092	0	0
2.102	0	0
2.112	0	0
2.122	0	0
2.132	0	0
2.141	0	0
2.151	0	0
2.161	0	0
2.171	0	0
2.181	0	0
2.191	0	0
2.2	0	0
2.21	0	0
2.22	0	0
2.23	0	0
2.24	0	0
2.249	0	0
2.259	0	0
2.269	0	0
2.279	0	0
2.289	0	0
2.299	0	0
2.308	0	0
2.318	0	0
2.328	0	0
2.338	0	0
2.348	0	0
2.357	0	0
2.367	0	0
2.377	0	0
2.387	0	0
2.397	0	0
2.406	0	0
2.416	0	0
2.426	0	0
2.436	0	0
2.446	0	0
2.456	0	0
2.465	0	0
2.475	0	0
2.485	0	0
2.495	0	0
2.505	0	0
2.514	0	0
2.524	0	0
2.534	0	0
2.544	0	0
2.554	0	0
2.564	0	0
2.573	0	0
2.583	0	0
2.593	0	0
2.603	0	0
2.613	0	0
2.622	0	0
2.632	0	0
2.642	0	0
2.652	0	0
2.662	0	0
2.672	0	0
2.681	0	0
2.691	0	0
2.701	0	0
2.711	0	0
2.721	0	0
2.73	0	0
2.74	0	0
2.75	0	0
2.76	0	0
2.77	0	0
2.78	0	0
2.789	0	0
2.799	0	0
2.809	0	0
2.819	0	0
2.829	0	0
2.838	0	0
2.848	0	0
2.858	0	0
2.868	0	0
2.878	0	0
2.888	0	0
2.897	0	0
2.907	0	0
2.917	0	0
2.927	0	0
2.937	0	0
2.946	0	0
2.956	0	0
2.966	0	0
2.976	0	0
2.986	0	0
2.995	0	0
3.005	0	0
3.015	0	0
3.025	0	0
3.035	0	0
3.045	0	0
3.054	0	0
3.064	0	0
3.074	0	0
3.084	0	0
3.094	0	0
3.103	0	0
3.113	0	0
3.123	0	0
3.133	0	0
3.143	0	0
3.153	0	0
3.162	0	0
3.172	0	0
3.182	0	0
3.192	0	0
3.202	0	0
3.211	0	0
3.221	0	0
3.231	0	0
3.241	0	0
3.251	0	0
3.261	0	0
3.27	0	0
3.28	0	0
3.29	0	0
3.3	0	0
3.31	0	0
3.319	0	0
3.329	0	0
3.339	0	0
3.349	0	0
3.359	0	0
3.369	0	0
3.378	0	0
3.388	0	0
3.398	0	0
3.408	0	0
3.418	0	0
3.427	0	0
3.437	0	0
3.447	0	0
3.457	0	0
3.467	0	0
3.477	0	0
3.486	0	0
3.496	0	0
3.506	0	0
3.516	0	0
3.526	0	0
3.535	0	0
3.545	0	0
3.555	0	0
3.565	0	0
3.575	0	0
3.584	0	0
3.594	0	0
3.604	0	0
3.614	0	0
3.624	0	0
3.634	0	0
3.643	0	0
3.653	0	0
3.663	0	0
3.673	0	0
3.683	0	0
3.692	0	0
3.702	0	0
3.712	0	0
3.722	0	0
3.732	0	0
3.742	0	0
3.751	0	0
3.761	0	0
3.771	0	0
3.781	0	0
3.791	0	0
3.8	0	0
3.81	0	0
3.82	0	0
3.83	0	0
3.84	0	0
3.85	0	0
3.859	0	0
3.869	0	0
3.879	0	0
3.889	0	0
3.899	0	0
3.908	0	0
3.918	0	0
3.928	0	0
3.938	0	0
3.948	0	0
3.958	0	0
3.967	0	0
3.977	0	0
3.987	0	0
3.997	0	0
4.007	0	0
4.016	0	0
4.026	0	0
4.036	0	0
4.046	0	0
4.056	0	0
4.066	0	0
4.075	0	0
4.085	0	0
4.095	0	0
4.105	0	0
4.115	0	0
4.124	0	0
4.134	0	0
4.144	0	0
4.154	0	0
4.164	0	0
4.173	0	0
4.183	0	0
4.193	0	0
4.203	0	0
4.213	0	0
4.223	0	0
4.232	0	0
4.242	0	0
4.252	0	0
4.262	0	0
4.272	0	0
4.281	0	0
4.291	0	0
4.301	0	0
4.311	0	0
4.321	0	0
4.331	0	0
4.34	0	0
4.35	0	0
4.36	0	0
4.37	0	0
4.38	0	0
4.389	0	0
4.399	0	0
4.409	0	0
4.419	0	0
4.429	0	0
4.439	0	0
4.448	0	0
4.458	0	0
4.468	0	0
4.478	0	0
4.488	0	0
4.497	0	0
4.507	0	0
4.517	0	0
4.527	0	0
4.537	0	0
4.547	0	0
4.556	0	0
4.566	0	0
4.576	0	0
4.586	0	0
4.596	0	0
4.605	0	0
4.615	0	0
4.625	0	0
4.635	0	0
4.645	0	0
4.655	0	0
4.664	0	0
4.674	0	0
4.684	0	0
4.694	0	0
4.704	0	0
4.713	0	0
4.723	0	0
4.733	0	0
4.743	0	0
4.753	0	0
4.762	0	0
4.772	0	0
4.782	0	0
4.792	0	0
4.802	0	0
4.812	0	0
4.821	0	0
4.831	0	0
4.841	0	0
4.851	0	0
4.861	0	0
4.87	0	0
4.88	0	0
4.89	0	0
4.9	0	0
4.91	0	0
4.92	0	0
4.929	0	0
4.939	0	0
4.949	0	0
4.959	0	0
4.969	0	0
4.978	0	0
4.988	0	0
4.998	0	0
5.008	0	0
5.018	0	0
5.028	0	0
5.037	0	0
5.047	0	0
5.057	0	0
5.067	0	0
5.077	0	0
5.086	0	0
5.096	0	0
5.106	0	0
5.116	0	0
5.126	0	0
5.136	0	0
5.145	0	0
5.155	0	0
5.165	0	0
5.175	0	0
5.185	0	0
5.194	0	0
5.204	0	0
5.214	0	0
5.224	0	0
5.234	0	0
5.244	0	0
5.253	0	0
5.263	0	0
5.273	0	0
5.283	0	0
5.293	0	0
5.302	0	0
5.312	0	0
5.322	0	0
5.332	0	0
5.342	0	0
5.351	0	0
5.361	0	0
5.371	0	0
5.381	0	0
5.391	0	0
5.401	0	0
5.41	0	0
5.42	0	0
5.43	0	0
5.44	0	0
5.45	0	0
5.459	0	0
5.469	0	0
5.479	0	0
5.489	0	0
5.499	0	0
5.509	0	0
5.518	0	0
5.528	0	0
5.538	0	0
5.548	0	0
5.558	0	0
5.567	0	0
5.577	0	0
5.587	0	0
5.597	6	0.03
5.607	12	0.06
5.617	17	0.09
5.626	12	0.06
5.636	60	0.3
5.646	228	1.15
5.656	690	3.48
5.666	1639	8.26
5.675	3348	16.87
5.685	5867	29.56
5.695	8934	45.01
5.705	12430	62.62
5.715	15793	79.57
5.725	18581	93.61
5.734	19849	100
5.744	19653	99.01
5.754	18287	92.13
5.764	16101	81.12
5.774	13351	67.26
5.783	10290	51.84
5.793	7676	38.67
5.803	5676	28.6
5.813	4331	21.82
5.823	3229	16.27
5.833	2382	12
5.842	1665	8.39
5.852	1188	5.99
5.862	815	4.11
5.872	587	2.96
5.882	425	2.14
5.891	353	1.78
5.901	297	1.5
5.911	268	1.35
5.921	228	1.15
5.931	205	1.03
5.94	180	0.91
5.95	148	0.75
5.96	106	0.53
5.97	65	0.33
5.98	63	0.32
5.99	84	0.42
5.999	98	0.49
6.009	81	0.41
6.019	63	0.32
6.029	55	0.28
6.039	60	0.3
6.048	49	0.25
6.058	32	0.16
6.068	12	0.06
6.078	6	0.03
6.088	9	0.05
6.098	14	0.07
6.107	14	0.07
6.117	9	0.05
6.127	6	0.03
6.137	9	0.05
6.147	26	0.13
6.156	43	0.22
6.166	55	0.28
6.176	44	0.22
6.186	23	0.12
6.196	6	0.03
6.206	0	0
6.215	6	0.03
6.225	17	0.09
6.235	35	0.18
6.245	43	0.22
6.255	40	0.2
6.264	26	0.13
6.274	12	0.06
6.284	3	0.02
6.294	0	0
6.304	0	0
6.314	6	0.03
6.323	12	0.06
6.333	17	0.09
6.343	15	0.08
6.353	15	0.08
6.363	14	0.07
6.372	14	0.07
6.382	9	0.05
6.392	3	0.02
6.402	3	0.02
6.412	9	0.05
6.422	20	0.1
6.431	26	0.13
6.441	26	0.13
6.451	14	0.07
6.461	6	0.03
6.471	0	0
6.48	0	0
6.49	0	0
6.5	0	0
6.51	0	0
6.52	0	0
6.529	0	0
6.539	0	0
6.549	0	0
6.559	3	0.02
6.569	6	0.03
6.579	12	0.06
6.588	12	0.06
6.598	17	0.09
6.608	24	0.12
6.618	38	0.19
6.628	44	0.22
6.637	41	0.21
6.647	29	0.15
6.657	17	0.09
6.667	17	0.09
6.677	21	0.11
6.687	28	0.14
6.696	26	0.13
6.706	21	0.11
6.716	9	0.05
6.726	6	0.03
6.736	9	0.05
6.745	14	0.07
6.755	14	0.07
6.765	9	0.05
6.775	3	0.02
6.785	0	0
6.795	0	0
6.804	3	0.02
6.814	9	0.05
6.824	14	0.07
6.834	20	0.1
6.844	21	0.11
6.853	26	0.13
6.863	29	0.15
6.873	40	0.2
6.883	40	0.2
6.893	35	0.18
6.903	17	0.09
6.912	6	0.03
6.922	0	0
6.932	0	0
6.942	0	0
6.952	0	0
6.961	0	0
6.971	0	0
6.981	0	0
6.991	0	0
7.001	0	0
7.011	0	0
7.02	0	0
7.03	0	0
7.04	0	0
7.05	0	0
7.06	0	0
7.069	0	0
7.079	3	0.02
7.089	9	0.05
7.099	14	0.07
7.109	14	0.07
7.118	9	0.05
7.128	3	0.02
7.138	0	0
7.148	0	0
7.158	0	0
7.168	0	0
7.177	0	0
7.187	0	0
7.197	0	0
7.207	0	0
7.217	0	0
7.226	0	0
7.236	0	0
7.246	0	0
7.256	0	0
[truncated: 5,399 more rows]
