# Supplementary material for: Extraction, identification and component analysis of exosome-like nanovesicles in Anoectochilus roxburghii (Wall.) Lindl.
Source: PeerJ journal article supplement (doi:10.7717/peerj.20182), 2025-10-13
Supplement: raw_data.zip [file Figure 4.xlsx]

## Sheet: data
Rutin
Data#	data name	sample name	sample type	Level number	retention time	area	concentration (ng/ml)	normal concentration	calibrated point	Sample bottle number	S/N	noise
1	Mixed standard substance001.lcd	Mixed standard substance001	Standard	1	5.495	517	0.247	0.25	1	1	(INF)	0
2	Mixed standard substance002.lcd	Mixed standard substance002	Standard	2	5.507	971	0.433	0.5	1	2	(INF)	0
3	Mixed standard substance003.lcd	Mixed standard substance003	Standard	3	5.481	2645	1.119	1	1	3	(INF)	0
4	Mixed standard substance004.lcd	Mixed standard substance004	Standard	4	5.484	4824	2.012	2	1	4	624.47	1.35
5	Mixed standard substance005.lcd	Mixed standard substance005	Standard	5	5.5	10127	4.184	4	1	5	(INF)	0
6	Mixed standard substance006.lcd	Mixed standard substance006	Standard	6	5.503	19188	7.897	8	1	6	(INF)	0
7	Mixed standard substance007.lcd	Mixed standard substance007	Standard	7	5.507	38115	15.652	16	1	7	2369.67	2.81
8	Mixed standard substance008.lcd	Mixed standard substance008	Standard	8	5.504	74682	30.635	32	1	8	13775.3	0.92
9	Mixed standard substance009.lcd	Mixed standard substance009	Standard	9	5.499	140559	57.628	64	1	9	3189.42	7.37
10	Mixed standard substance010.lcd	Mixed standard substance010	Standard	10	5.489	285800	117.139	128	1	10	5558.14	9.04
11	Mixed standard substance011.lcd	Mixed standard substance011	Standard	11	5.496	707840	290.065	256	0	11	9860.57	14.07
12	Mixed standard substance012.lcd	Mixed standard substance012	Standard	12	5.491	1799797	737.484	512	0	12	12638.2	26.94
13	Mixed standard substance013.lcd	Mixed standard substance013	Standard	13	5.491	3715611	1522.47	1024	0	13	17556.4	37.18
16	soil-based cultivation001.lcd	soil-based cultivation001	unknown	0	5.501	6991	2.9	-----	-----	14	46.21	27.21
17	soil-based cultivation002.lcd	soil-based cultivation002	unknown	0	5.492	6814	2.827	-----	-----	15	63.81	19.49
24	soil-based cultivation003.lcd	soil-based cultivation003	unknown	0	5.502	12951	5.342	-----	-----	16	75.94	31.96
20	hydroponics001.lcd	hydroponics001	unknown	0	5.479	683	0.315	-----	-----	17	43.02	3.18
21	hydroponics002.lcd	hydroponics002	unknown	0	5.517	1001	0.445	-----	-----	18	185.78	1.24
28	hydroponics003.lcd	hydroponics003	unknown	0	5.488	1301	0.568	-----	-----	19	54.06	3.85
Narcissin
Data#	data name	sample name	sample type	Level number	retention time	area	concentration (ng/ml)	normal concentration	calibrated point	Sample bottle number	S/N	noise
1	Mixed standard substance001.lcd	Mixed standard substance001	Standard	1	5.709	416	0.252	0.25	1	1	123.53	0.88
2	Mixed standard substance002.lcd	Mixed standard substance002	Standard	2	5.741	972	0.478	0.5	1	2	532.3	0.41
3	Mixed standard substance003.lcd	Mixed standard substance003	Standard	3	5.721	2010	0.898	1	1	3	987.81	0.44
4	Mixed standard substance004.lcd	Mixed standard substance004	Standard	4	5.743	4463	1.893	2	1	4	(INF)	0
5	Mixed standard substance005.lcd	Mixed standard substance005	Standard	5	5.732	9459	3.918	4	1	5	2432.59	0.7
6	Mixed standard substance006.lcd	Mixed standard substance006	Standard	6	5.74	18298	7.5	8	1	6	1702.69	1.88
7	Mixed standard substance007.lcd	Mixed standard substance007	Standard	7	5.746	41849	17.046	16	1	7	9948.29	0.69
8	Mixed standard substance008.lcd	Mixed standard substance008	Standard	8	5.738	80425	32.682	32	1	8	3465.85	4.05
9	Mixed standard substance009.lcd	Mixed standard substance009	Standard	9	5.726	156213	63.4	64	1	9	3762.18	6.96
10	Mixed standard substance010.lcd	Mixed standard substance010	Standard	10	5.718	302790	122.81	128	1	10	5393.35	9.39
11	Mixed standard substance011.lcd	Mixed standard substance011	Standard	11	5.724	592331	240.167	256	0	11	4553.13	22.08
12	Mixed standard substance012.lcd	Mixed standard substance012	Standard	12	5.727	1372842	556.524	512	0	12	12014.7	19.36
13	Mixed standard substance013.lcd	Mixed standard substance013	Standard	13	5.729	3156346	1279.41	1024	0	13	11812.9	46.33
16	soil-based cultivation001.lcd	soil-based cultivation001	unknown	0	5.728	33725	13.753	-----	-----	14	18.16	324.83
17	soil-based cultivation002.lcd	soil-based cultivation002	unknown	0	5.726	35554	14.495	-----	-----	15	20.02	306.42
24	soil-based cultivation003.lcd	soil-based cultivation003	unknown	0	5.741	37728	15.375	-----	-----	18	18.15	355.62
20	hydroponics001.lcd	hydroponics001	unknown	0	5.728	9514	3.94	-----	-----	16	27.29	54.63
21	hydroponics002.lcd	hydroponics002	unknown	0	5.726	8897	3.69	-----	-----	17	27.67	63.99
28	hydroponics003.lcd	hydroponics003	unknown	0	5.733	12127	4.999	-----	-----	19	33.84	65.21
Quercetin
Data#	data name	sample name	sample type	Level number	retention time	area	concentration (ng/ml)	normal concentration	calibrated point	Sample bottle number	S/N	noise
1	Mixed standard substance001.lcd	Mixed standard substance001	Standard	1	6.021	1306	0.233	0.25	1	1	53.14	6.65
2	Mixed standard substance002.lcd	Mixed standard substance002	Standard	2	6.032	3581	0.495	0.5	1	2	54.4	11.6
3	Mixed standard substance003.lcd	Mixed standard substance003	Standard	3	6.048	9448	1.17	1	1	3	543.52	2.6
4	Mixed standard substance004.lcd	Mixed standard substance004	Standard	4	6.032	15877	1.909	2	1	4	601.09	4.66
5	Mixed standard substance005.lcd	Mixed standard substance005	Standard	5	6.039	29318	3.455	4	1	5	1035.38	5.02
6	Mixed standard substance006.lcd	Mixed standard substance006	Standard	6	6.038	65829	7.654	8	1	6	1177.55	9.61
7	Mixed standard substance007.lcd	Mixed standard substance007	Standard	7	6.049	122582	14.182	16	1	7	1506.17	14.14
8	Mixed standard substance008.lcd	Mixed standard substance008	Standard	8	6.041	270972	31.249	32	1	8	2351.41	19.64
9	Mixed standard substance009.lcd	Mixed standard substance009	Standard	9	6.033	564382	64.996	64	1	9	5254.65	18.25
10	Mixed standard substance010.lcd	Mixed standard substance010	Standard	10	6.024	1131670	130.243	128	1	10	5720.18	32.94
11	Mixed standard substance011.lcd	Mixed standard substance011	Standard	11	6.028	2192325	252.236	256	0	11	12258.8	29.85
12	Mixed standard substance012.lcd	Mixed standard substance012	Standard	12	6.028	3836564	441.35	512	0	12	7309.43	79.57
13	Mixed standard substance013.lcd	Mixed standard substance013	Standard	13	6.032	6684260	768.881	1024	0	13	6176.07	160.63
16	soil-based cultivation001.lcd	soil-based cultivation001	unknown	0	6.039	110290	12.768	-----	-----	14	162.94	117.12
17	soil-based cultivation002.lcd	soil-based cultivation002	unknown	0	6.031	117101	13.551	-----	-----	15	165.18	117.2
24	soil-based cultivation003.lcd	soil-based cultivation003	unknown	0	6.043	119115	13.783	-----	-----	18	311.42	64.66
20	hydroponics001.lcd	hydroponics001	unknown	0	6.105	3766	0.516	-----	-----	16	27.42	17.21
21	hydroponics002.lcd	hydroponics002	unknown	0	6.111	4010	0.544	-----	-----	17	55	9.19
28	hydroponics003.lcd	hydroponics003	unknown	0	6.107	3302	0.463	-----	-----	19	28.13	20.08
Kaempferol
Data#	data name	sample name	sample type	Level number	retention time	area	concentration (ng/ml)	normal concentration	calibrated point	Sample bottle number	S/N	noise
1	Mixed standard substance001.lcd	Mixed standard substance001	Standard	1	6.296	306	0.228	0.25	1	1	(INF)	0
2	Mixed standard substance002.lcd	Mixed standard substance002	Standard	2	6.295	777	0.565	0.5	1	2	(INF)	0
3	Mixed standard substance003.lcd	Mixed standard substance003	Standard	3	6.29	1319	0.953	1	1	3	437.24	0.67
4	Mixed standard substance004.lcd	Mixed standard substance004	Standard	4	6.287	2379	1.712	2	1	4	469.64	1.05
5	Mixed standard substance005.lcd	Mixed standard substance005	Standard	5	6.296	5961	4.275	4	1	5	644.54	1.55
6	Mixed standard substance006.lcd	Mixed standard substance006	Standard	6	6.292	11235	8.049	8	1	6	1680.53	1.16
7	Mixed standard substance007.lcd	Mixed standard substance007	Standard	7	6.305	19505	13.968	16	1	7	766.33	4.25
8	Mixed standard substance008.lcd	Mixed standard substance008	Standard	8	6.304	45026	32.232	32	1	8	4621.03	1.61
9	Mixed standard substance009.lcd	Mixed standard substance009	Standard	9	6.294	87550	62.664	64	1	9	6447.92	2.32
10	Mixed standard substance010.lcd	Mixed standard substance010	Standard	10	6.288	174178	124.659	128	1	10	6141.44	4.82
11	Mixed standard substance011.lcd	Mixed standard substance011	Standard	11	6.287	313802	224.58	256	0	11	4732.1	10.66
12	Mixed standard substance012.lcd	Mixed standard substance012	Standard	12	6.288	548621	392.628	512	0	12	5944.76	14.44
13	Mixed standard substance013.lcd	Mixed standard substance013	Standard	13	6.292	965174	690.731	1024	0	13	6967.55	20.55
16	soil-based cultivation001.lcd	soil-based cultivation001	unknown	0	6.302	52159	37.337	-----	-----	14	589.17	15.74
17	soil-based cultivation002.lcd	soil-based cultivation002	unknown	0	6.291	54230	38.819	-----	-----	15	459.84	20.22
24	soil-based cultivation003.lcd	soil-based cultivation003	unknown	0	6.305	79012	56.554	-----	-----	18	546.46	24.51
20	hydroponics001.lcd	hydroponics001	unknown	0	6.146	94	0.077	-----	-----	16	2.66	16.57
21	hydroponics002.lcd	hydroponics002	unknown	0	6.27	278	0.208	-----	-----	17	4.31	13.46
28	hydroponics003.lcd	hydroponics003	unknown	0	6.398	1083	0.784	-----	-----	19	14.85	14.95
Isorhamnetin
Data#	data name	sample name	sample type	Level number	retention time	area	concentration (ng/ml)	normal concentration	calibrated point	Sample bottle number	S/N	noise
1	Mixed standard substance001.lcd	Mixed standard substance001	Standard	1	5.553	94	-0.099	0.25	0	1	75.27	0.58
2	Mixed standard substance002.lcd	Mixed standard substance002	Standard	2	5.549	1485	0.508	0.5	1	2	(INF)	0
3	Mixed standard substance003.lcd	Mixed standard substance003	Standard	3	5.53	2428	0.919	1	1	3	(INF)	0
4	Mixed standard substance004.lcd	Mixed standard substance004	Standard	4	5.518	4595	1.865	2	1	4	669.19	1.25
5	Mixed standard substance005.lcd	Mixed standard substance005	Standard	5	5.524	9140	3.847	4	1	5	(INF)	0
6	Mixed standard substance006.lcd	Mixed standard substance006	Standard	6	5.533	17578	7.527	8	1	6	3353.16	1.02
7	Mixed standard substance007.lcd	Mixed standard substance007	Standard	7	5.546	39044	16.889	16	1	7	1559.91	4.35
8	Mixed standard substance008.lcd	Mixed standard substance008	Standard	8	5.54	76101	33.051	32	1	8	2405.68	5.7
9	Mixed standard substance009.lcd	Mixed standard substance009	Standard	9	5.534	141414	61.537	64	1	9	1841.84	13.54
10	Mixed standard substance010.lcd	Mixed standard substance010	Standard	10	5.522	271176	118.132	128	1	10	3082.77	14.59
11	Mixed standard substance011.lcd	Mixed standard substance011	Standard	11	5.522	598964	261.095	256	1	11	4216.84	25.17
12	Mixed standard substance012.lcd	Mixed standard substance012	Standard	12	5.524	1316555	574.068	512	0	12	6854.14	35.29
13	Mixed standard substance013.lcd	Mixed standard substance013	Standard	13	5.525	2582112	1126.03	1024	0	13	8850.62	47.84
16	soil-based cultivation001.lcd	soil-based cultivation001	unknown	0	5.532	275633	120.076	-----	-----	14	5285.66	9.33
17	soil-based cultivation002.lcd	soil-based cultivation002	unknown	0	5.522	281494	122.632	-----	-----	15	3884.07	12.91
24	soil-based cultivation003.lcd	soil-based cultivation003	unknown	0	5.534	386879	168.596	-----	-----	18	4246.46	15.98
20	hydroponics001.lcd	hydroponics001	unknown	0	5.529	3767	1.503	-----	-----	16	138.83	4.77
21	hydroponics002.lcd	hydroponics002	unknown	0	5.534	4781	1.945	-----	-----	17	102.28	7.04
28	hydroponics003.lcd	hydroponics003	unknown	0	5.521	5066	2.07	-----	-----	19	149.43	6.6
Isorhamnetin
Data#	data name	sample name	sample type	Level number	retention time	area	concentration (ng/ml)	normal concentration	calibrated point	Sample bottle number	S/N	noise
1	Mixed standard substance001.lcd	Mixed standard substance001	Standard	1	6.335	707	-0.337	0.025	0	1	(INF)	0
2	Mixed standard substance002.lcd	Mixed standard substance002	Standard	2	6.366	1768	-0.296	0.05	0	2	(INF)	0
3	Mixed standard substance003.lcd	Mixed standard substance003	Standard	3	6.335	3088	-0.246	0.1	0	3	87.45	5.34
4	Mixed standard substance004.lcd	Mixed standard substance004	Standard	4	6.333	6689	-0.109	0.2	1	4	1651.95	0.67
5	Mixed standard substance005.lcd	Mixed standard substance005	Standard	5	6.352	13877	0.165	0.4	1	5	258.09	8.75
6	Mixed standard substance006.lcd	Mixed standard substance006	Standard	6	6.335	20968	0.436	0.8	1	6	971.2	3.71
7	Mixed standard substance007.lcd	Mixed standard substance007	Standard	7	6.356	44693	1.341	1.6	1	7	2218.28	3.32
8	Mixed standard substance008.lcd	Mixed standard substance008	Standard	8	6.35	91860	3.14	3.2	1	8	23626.3	0.67
9	Mixed standard substance009.lcd	Mixed standard substance009	Standard	9	6.343	197149	7.157	6.4	1	9	3577.38	9.64
10	Mixed standard substance010.lcd	Mixed standard substance010	Standard	10	6.338	356508	13.235	12.8	1	10	7135.4	8.36
11	Mixed standard substance011.lcd	Mixed standard substance011	Standard	11	6.343	650084	24.434	25.6	1	11	7095.74	16.04
12	Mixed standard substance012.lcd	Mixed standard substance012	Standard	12	6.348	1172691	44.369	51.2	0	12	10022.6	18.85
13	Mixed standard substance013.lcd	Mixed standard substance013	Standard	13	6.348	2209066	83.902	102.4	0	13	26617.4	12.81
16	soil-based cultivation001.lcd	soil-based cultivation001	unknown	0	6.339	407623	15.185	-----	-----	14	1249.48	51.67
17	soil-based cultivation002.lcd	soil-based cultivation002	unknown	0	6.326	413085	15.394	-----	-----	15	1102.64	58.08
24	soil-based cultivation003.lcd	soil-based cultivation003	unknown	0	6.336	614494	23.076	-----	-----	18	1008.65	102.5
20	hydroponics001.lcd	hydroponics001	unknown	0	6.322	78996	2.649	-----	-----	16	775.84	14.96
21	hydroponics002.lcd	hydroponics002	unknown	0	6.323	82472	2.782	-----	-----	17	849.11	14.99
28	hydroponics003.lcd	hydroponics003	unknown	0	6.321	122646	4.315	-----	-----	19	1123.21	17.35

## Sheet: statistics
ARENVs were diluted 4 times with PBS, and then 50 ul was added to 200 ul of methanol for precipitation. After centrifugation twice, the sample was then tested.
	soil-based cultivation							hydroponics
measured concentration（ng/ml)	Rutin	Narcissin	Quercetin	Kaempferol	Isorhamnetin	Isorhamnetin		Rutin	Narcissin	Quercetin	Kaempferol	Isorhamnetin	Isorhamnetin
	2.9	13.753	12.768	37.337	120.076	15.185		0.315	3.94	0.516	0.077	1.503	2.649
	2.827	14.495	13.551	38.819	122.632	15.394		0.445	3.69	0.544	0.208	1.945	2.782
	5.342	15.375	13.783	56.554	168.596	23.076		0.568	4.999	0.463	0.784	2.07	4.315
concentration(ng/100g A. roxburghii)	Rutin	Narcissin	Quercetin	Kaempferol	Isorhamnetin	Isorhamnetin		Rutin	Narcissin	Quercetin	Kaempferol	Isorhamnetin	Isorhamnetin
	23.2	110.024	102.144	298.696	960.608	121.48		2.52	31.52	4.128	0.616	12.024	21.192
	22.616	115.96	108.408	310.552	981.056	123.152		3.56	29.52	4.352	1.664	15.56	22.256
	42.736	123	110.264	452.432	1348.77	184.608		4.544	39.992	3.704	6.272	16.56	34.52
